# Supplementary material for: Direct Conjugation of Resveratrol on Hydrophilic Gold Nanoparticles: Structural and Cytotoxic Studies for Biomedical Applications
Source: PubMed Central journal article supplement (PMC7598182; doi:10.3390/nano10101898), 2020-09-23
Supplement: nanomaterials-10-01898-s001.pdf [file nanomaterials-10-01898-s001.pdf]

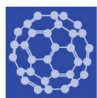

Article

# Direct Conjugation of Resveratrol on Hydrophilic Gold Nanoparticles: Structural and Cytotoxic Studies for Biomedical Applications

Iole Venditti <sup>1,\*</sup>, Giovanna Iucci <sup>1</sup>, Iliara Fratoddi <sup>2</sup>, Manuela Cipolletti <sup>1</sup>, Emiliano Montalesi <sup>1</sup>, Maria Marino <sup>1</sup>, Valeria Secchi <sup>1</sup> and Chiara Battocchio <sup>1</sup>

<sup>1</sup> Department of Sciences, Roma Tre University of Rome, 00146 Rome, Italy; giovanna.iucci@uniroma3.it (G.I.); manuela.cipolletti@uniroma3.it (M.C.); emiliano.montalesi@uniroma3.it (E.M.); maria.marino@uniroma3.it (M.M.); valeria.secchi@uniroma3.it (V.S.); chiara.battocchio@uniroma3.it (C.B.)

<sup>2</sup> Department of Chemistry, Sapienza University of Rome, 00185 Rome, Italy; ilia.fratoddi@uniroma1.it

\* Correspondence: iole.venditti@uniroma3.it; Tel.: +39-06-5733-3388

Received: 31 August 2020; Accepted: 18 September 2020; Published: 23 September 2020

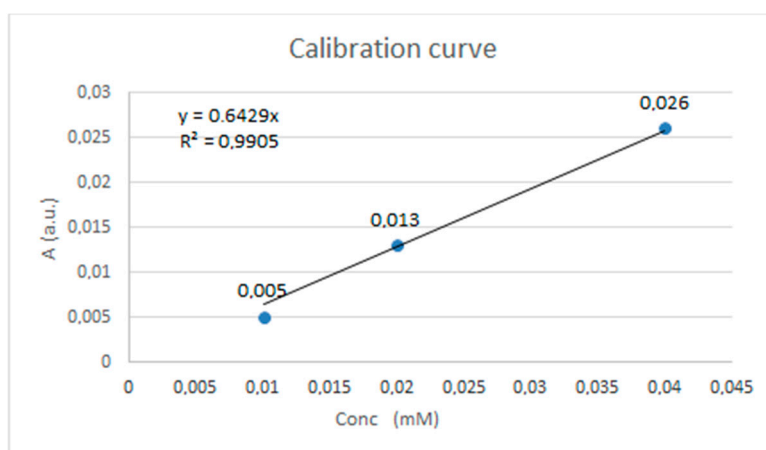

Figure S1. Calibration curve of RSV in water.

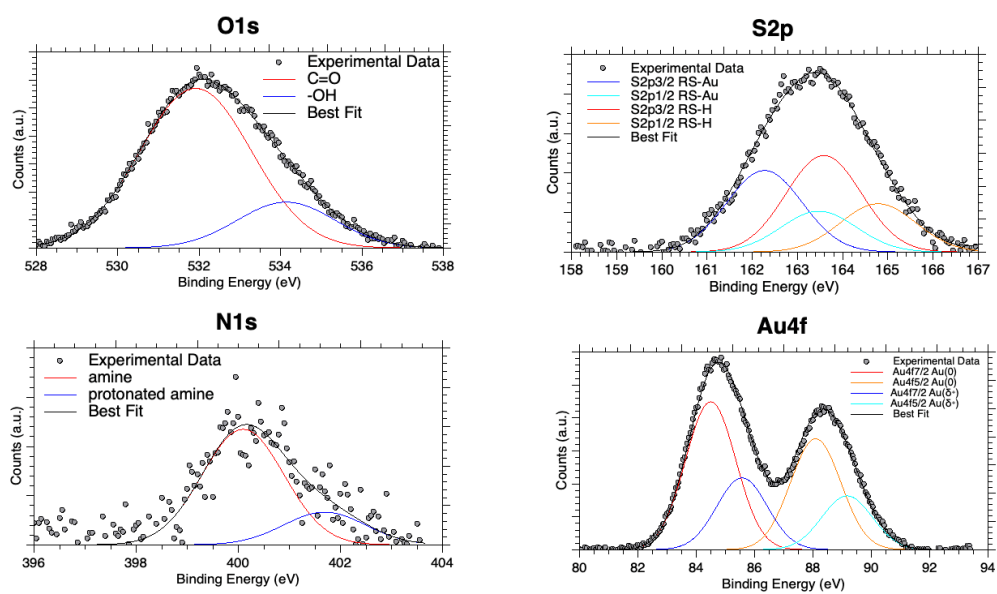

Figure S2. O1s, N1s, S2p and Au4f XPS spectra of AuNPs@RSV1.

Table S1. XPS BE, FWHM, Atomic Percent values and Assignments.

| Sample     | Signal              | BE (eV) | FWHM (eV) | Atomic Percent (%)<br>or Atomic Ratio (O <sub>i</sub> /O <sub>j</sub> ) | Assignment                    |
|------------|---------------------|---------|-----------|-------------------------------------------------------------------------|-------------------------------|
| AuNPs      | C1s                 | 285.00  | 1.81      | 32.7                                                                    | C–C                           |
|            |                     | 286.82  | 1.81      | 28.2                                                                    | C–N, C–S, C–O                 |
|            |                     | 288.37  | 1.81      | 24.2                                                                    | COOH                          |
|            |                     | 290.07  | 1.81      | 10.1                                                                    | COO–                          |
|            |                     | 291.72  | 1.81      | 4.8                                                                     | impurities                    |
|            | Au4f <sub>7/2</sub> | 84.00   | 2.03      | 67.3                                                                    | Au(0)                         |
|            |                     | 85.07   | 2.03      | 32.7                                                                    | Au(+)                         |
|            | S2p <sub>3/2</sub>  | 162.27  | 1.96      | 45.8                                                                    | RS–Au                         |
|            |                     | 163.59  | 1.96      | 54.2                                                                    | RS–H                          |
|            | N1s                 | 400.13  | 2.50      | 71.7                                                                    | RNH <sub>2</sub>              |
| 401.74     |                     | 2.50    | 28.3      | RNH <sub>3</sub> <sup>+</sup>                                           |                               |
| O1s        | 531.93              | 2.85    | 3.0       | O=C–                                                                    |                               |
|            | 533.34              | 2.85    | 1.0       | –O–H                                                                    |                               |
| RSV        | C1s                 | 284.70  | 1.54      | 79.2                                                                    | C–C                           |
|            |                     | 286.38  | 1.54      | 11.4                                                                    | C–OH                          |
|            |                     | 289.00  | 1.54      | 9.4                                                                     | COOH impurities               |
|            | O1s                 | 529.66  | 1.62      | -                                                                       | TiO <sub>2</sub> (substrate)  |
|            |                     | 531.47  | 1.62      | 2.3                                                                     | O=C–                          |
|            |                     | 532.92  | 1.62      | 1.0                                                                     | –O–H                          |
| AuNPs@RSV1 | C1s                 | 285.00  | 2.17      | 44.4                                                                    | C–C aliphatic+aromatic        |
|            |                     | 286.60  | 2.17      | 32.0                                                                    | C–N, C–S, C–O                 |
|            |                     | 288.45  | 2.17      | 18.5                                                                    | COOH                          |
|            |                     | 290.31  | 2.17      | 5.1                                                                     | COO–                          |
|            | Au4f <sub>7/2</sub> | 83.96   | 1.20      | 79.9                                                                    | Au(0)                         |
|            |                     | 84.97   | 1.20      | 23.1                                                                    | Au(+)                         |
|            | S2p <sub>3/2</sub>  | 161.99  | 1.82      | 68.1                                                                    | RS–Au                         |
|            |                     | 164.11  | 1.82      | 31.9                                                                    | RS–H                          |
|            | N1s                 | 400.10  | 1.89      | 80.0                                                                    | RNH <sub>2</sub>              |
|            |                     | 401.69  | 1.89      | 20.0                                                                    | RNH <sub>3</sub> <sup>+</sup> |
| O1s        | 529.47              | 3.03    | -         | TiO <sub>2</sub> (substrate)                                            |                               |
|            | 532.12              | 3.03    | 2.3       | O=C–                                                                    |                               |
|            | 533.18              | 3.03    | 1.0       | –O–H                                                                    |                               |
| AuNPs@RSV2 | C1s                 | 284.70  | 1.60      | 87.3                                                                    | C–C aliphatic+aromatic        |
|            |                     | 286.48  | 1.60      | 4.9                                                                     | C–OH                          |
|            |                     | 288.16  | 1.60      | 7.8                                                                     | COOH                          |
|            | Au4f <sub>7/2</sub> | 83.98   | 1.29      | 82.6                                                                    | Au(0)                         |
|            |                     | 85.00   | 1.29      | 17.4                                                                    | Au(+)                         |
|            | S2p <sub>3/2</sub>  | 161.54  | 1.86      | 80.6                                                                    | RS–Au                         |
|            |                     | 163.79  | 1.86      | 19.4                                                                    | RS–H                          |
|            | N1s                 | 399.18  | 2.51      | 100                                                                     | RNH <sub>2</sub>              |
|            | O1s                 | 529.66  | 1.79      | -                                                                       | TiO <sub>2</sub> (substrate)  |
|            |                     | 531.20  | 1.79      | 4.2                                                                     | O=C–                          |
| 532.87     |                     | 1.79    | 1.0       | –O–H                                                                    |                               |
